# Supplementary material for: Synthesis and characterization of novel donor–acceptor type electrochromic polymers containing diketopyrrolopyrrole as an acceptor and propylenedioxythiophene or indacenodithiophene as a donor
Source: Royal Society of Chemistry journal article supplement (doi:10.1039/c8ra03570a), 2018-01-01
Supplement: c8ra03570a1.pdf [file c8ra03570a1.pdf]

## Supporting Information

### **Synthesis and characterization of novel donor-acceptor type electrochromic polymers containing diketopyrrolopyrrole as acceptor and propylenedioxythiophene or indacenodithiophene as donor**

Xinfeng Cheng<sup>a</sup>, Xiuping Ju<sup>c</sup>, Hongmei Du<sup>b</sup>, Yan Zhang<sup>b</sup>, Jinsheng Zhao<sup>\*b</sup>, Yu Xie<sup>\*d</sup>

<sup>a</sup>College of Chemistry and Pharmaceutical Engineering, Nanyang Normal University,  
Nanyang 473061, P.R. China

<sup>b</sup>Shandong Key laboratory of Chemical Energy Storage and Novel Cell Technology,  
Liaocheng University, Liaocheng, 252059, P.R. China

<sup>c</sup>Dongchang College, Liaocheng University, Liaocheng, 252059, P.R. China

<sup>d</sup>College of Environment and Chemical Engineering, Nanchang Hangkong University,  
Nanchang 330063, PR China.

Correspondence to: Jinsheng Zhao (E-mail: [j.s.zhao@163.com](mailto:j.s.zhao@163.com));  
[xieyu\\_121@163.com](mailto:xieyu_121@163.com) (Yu Xie)

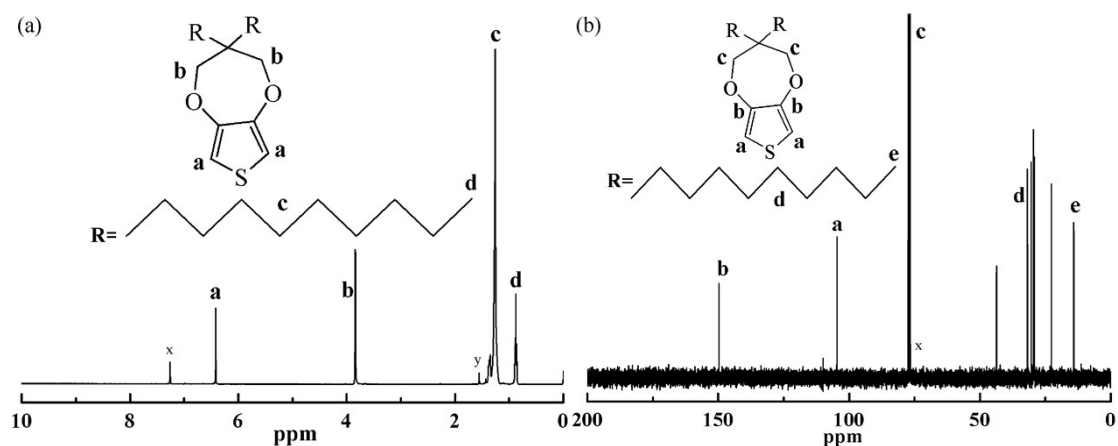

**Fig. S1.** <sup>1</sup>H NMR spectrum of 3,3-Bis-decyl-3,4-dihydro-2H-thieno[3,4-b][1,4]dioxepine (a), CDCl<sub>3</sub> Solvent peak and water speak were marked by 'x', 'y' respectively, <sup>13</sup>C NMR spectrum of 3,3-Bis-decyl-3,4-dihydro-2H-thieno[3,4-b][1,4]dioxepine (b), CDCl<sub>3</sub> Solvent peak were marked by 'x'.

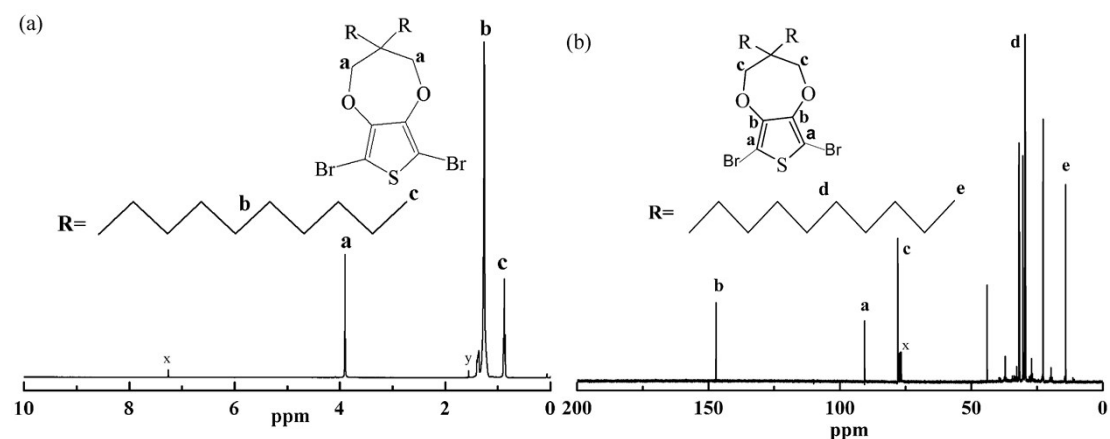

**Fig. S2.** <sup>1</sup>H NMR spectrum of 6,8-Dibromo-3,3-bis-decyl-3,4-dihydro-2H-thieno[3,4-b][1,4]dioxepine (a), CDCl<sub>3</sub> Solvent peak and water speak were marked by 'x', 'y' respectively, <sup>13</sup>C NMR spectrum of 6,8-Dibromo-3,3-bis-decyl-3,4-dihydro-2H-thieno[3,4-b][1,4]dioxepine (b), CDCl<sub>3</sub> Solvent peak were marked by 'x'.

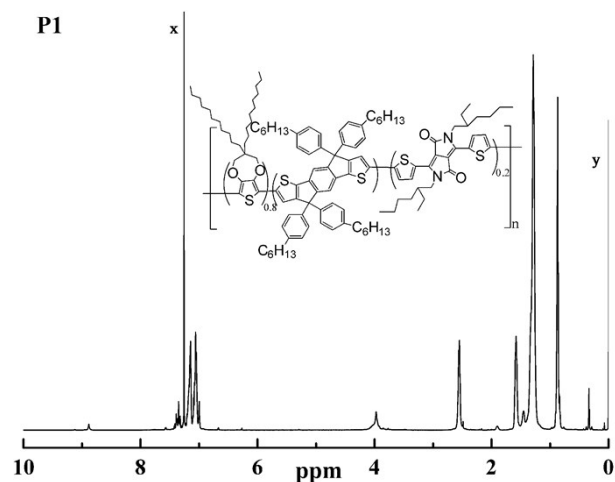

**Fig. S3.**  $^1\text{H}$  NMR spectrum of **P1**,  $\text{CHCl}_3$  Solvent and tetramethylsilane peaks were marked by 'x', 'y', respectively.

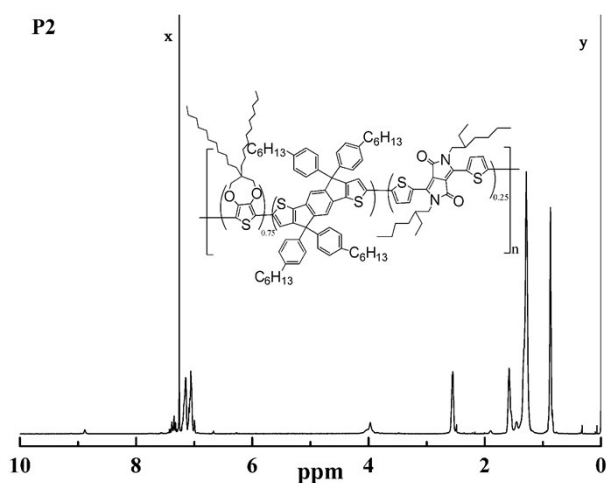

**Fig. S4.**  $^1\text{H}$  NMR spectrum of **P2**,  $\text{CHCl}_3$  Solvent and tetramethylsilane peaks were marked by 'x', 'y', respectively.

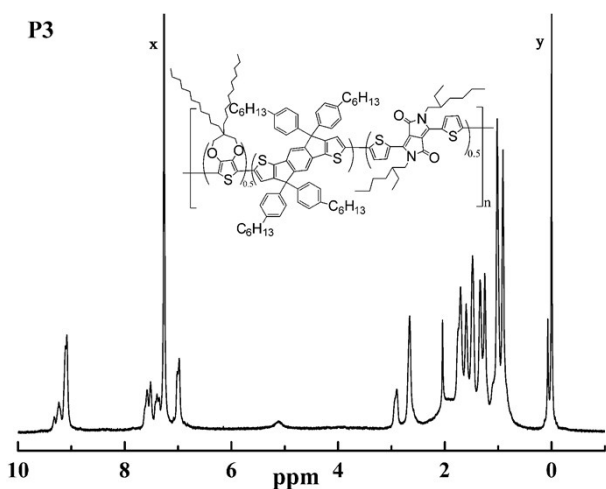

**Fig. S5.**  $^1\text{H}$  NMR spectrum of **P3**,  $\text{CHCl}_3$  Solvent and tetramethylsilane peaks were marked by 'x', 'y', respectively.

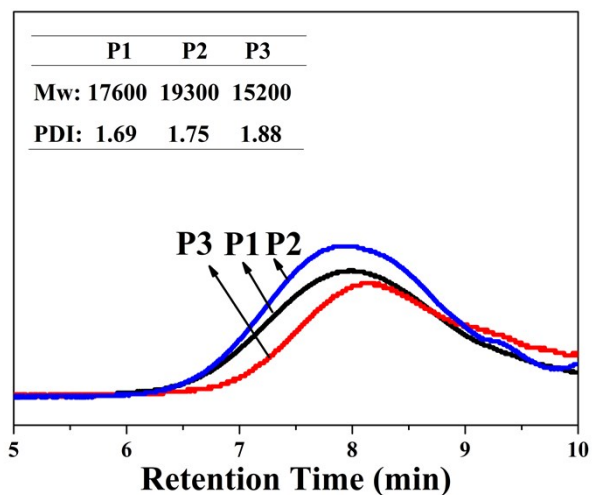

Fig. S6 GPC trace of the polymers **P1**, **P2** and **P3**.

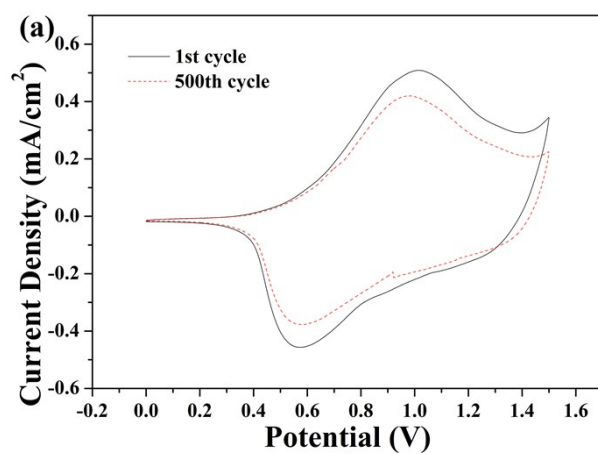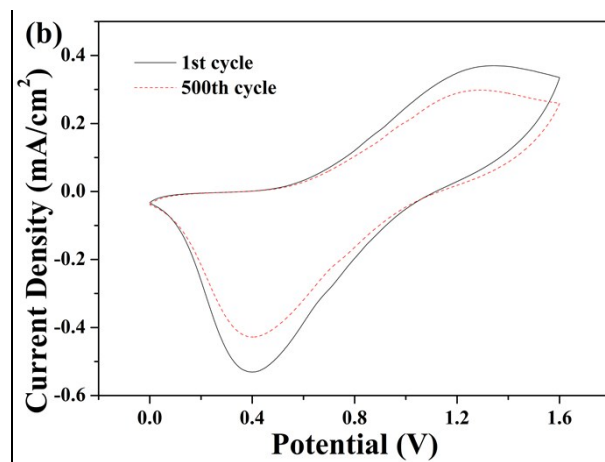

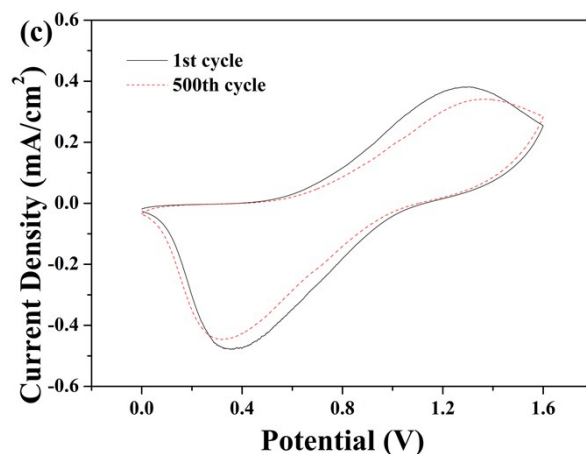

**Fig. S7** CVs of the polymers **P1** (a), **P2** (b) and **P3** (c).

After 500 cycles, these polymers could retain 84%, 82% and 87% of their original electroactivity for P1, P2 and P3, respectively.

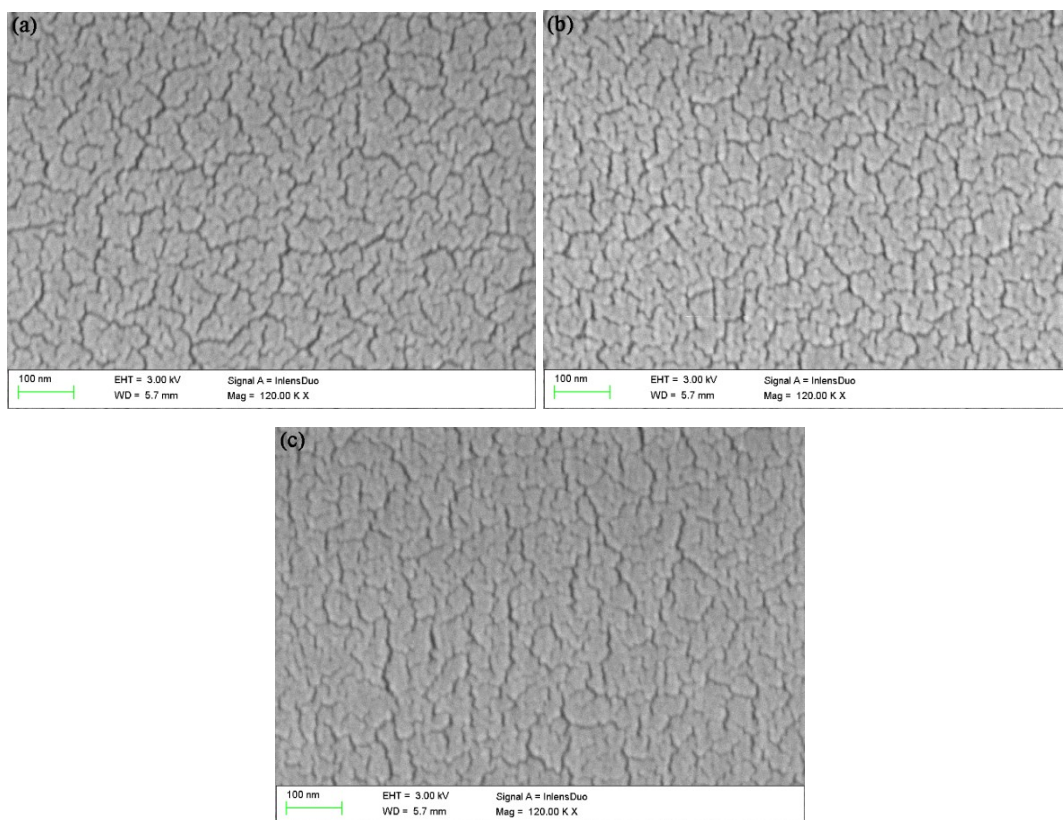

**Fig. S8.** SEM images of polymeric films **P1** (a), **P2** (b) and **P3** (c).

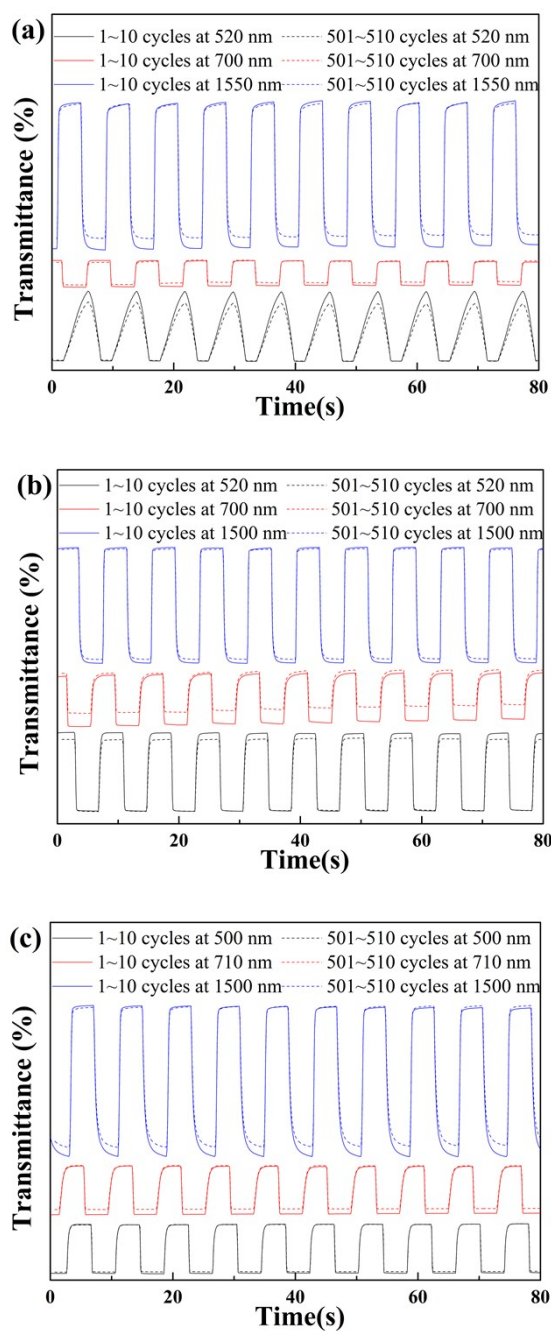

**Fig. S9** Optical transmittance change of **P1(a)**, **P2(b)**, **P3(c)** at different wavelengths and cycle numbers.

After 500 cycles, for **P1** film, the optical contrast remained 87% at 520 nm, 88% at 700 nm and 92% at 1550 nm, respectively. For **P2** film, the optical contrast remained 91% at 520 nm, 78% at 700 nm and 95% at 1500 nm after 500 cycles, respectively. While for **P3** film, the optical contrast remained 96% at 500 nm, 91% at 710 nm and 93% at 1500 nm after 500 cycles, respectively.

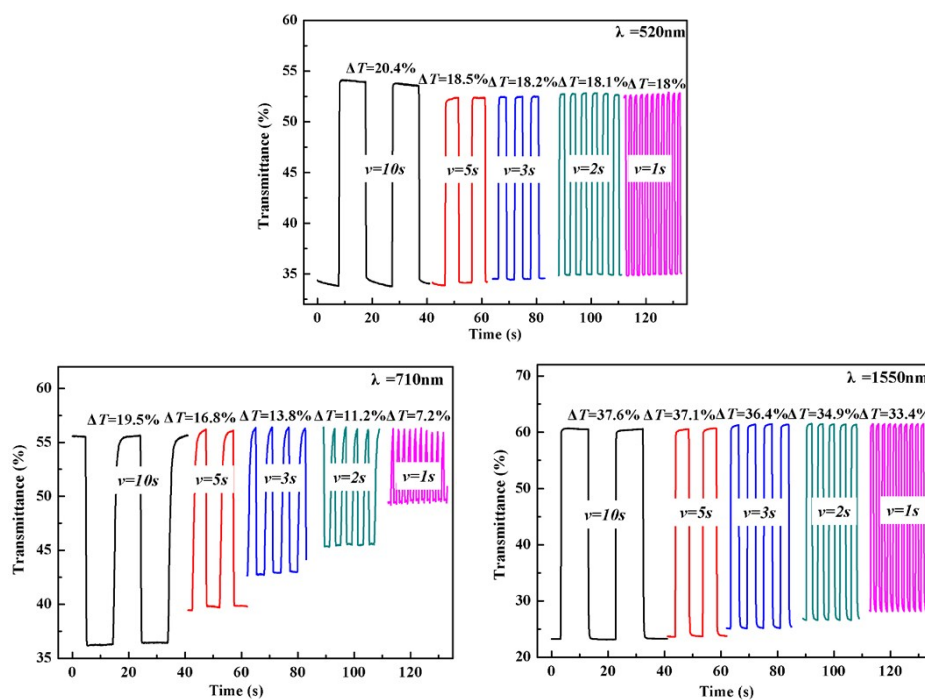

**Fig. S10.** Electrochromic switching of P2 at 520 nm, 710 nm and 1550 nm with an interval of 10 s, 5 s, 3 s, 2 s, 1s, respectively.

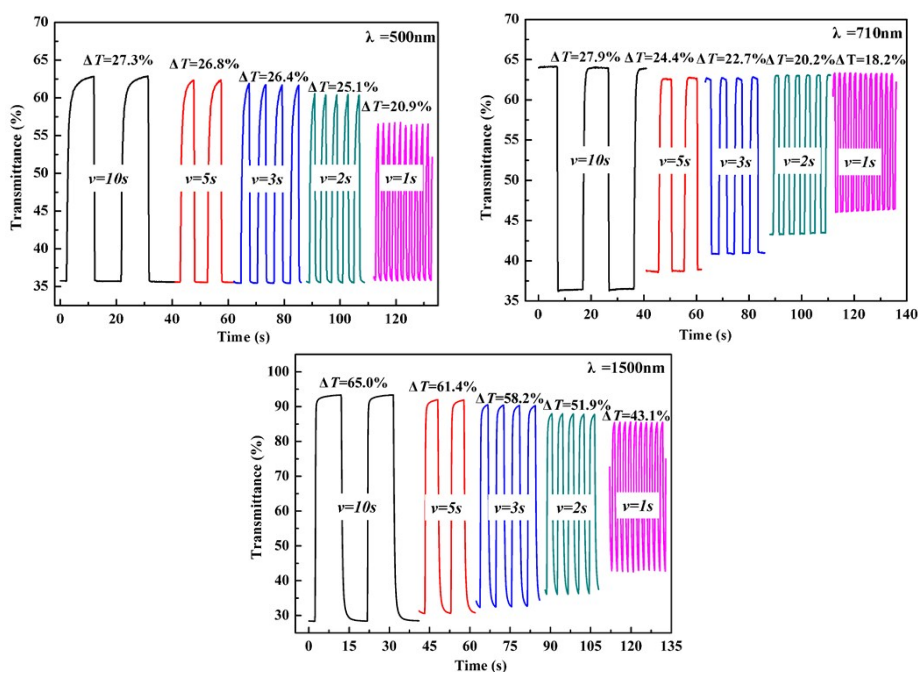

**Fig. S11.** Electrochromic switching of P3 at 500 nm, 710 nm and 1550 nm with an interval of 10 s, 5 s, 3 s, 2 s, 1s, respectively.
